# Supplementary material for: A self-healing elastomer with outstanding mechanical properties was designed based on urea bonds
Source: Royal Society of Chemistry journal article supplement (doi:10.1039/d4tc01123f), 2024-01-01
Supplement: d4tc01123f1.pdf [file d4tc01123f1.pdf]

Support Information

## A self-healing elastomer with outstanding mechanical properties designed based on urea bonds

Yanpeng Cao <sup>a, b, 1</sup>, Rui Yan <sup>a, b, 1</sup>, Xiaoye Wo <sup>b</sup>, Jinlong Ma <sup>a, b</sup>, Xiao Yu <sup>a, b</sup>, Aijun Li <sup>a, b</sup>, Jian Huang <sup>a, b, d</sup>, Fenghua Li <sup>c</sup> and Qixian Zhang <sup>a, b, d, \*</sup>

<sup>a</sup> School of Materials Science and Engineering, Shanghai University, Shanghai 200436, PR China

<sup>b</sup> Shaoxing Institute of Technology, Shanghai University, Shaoxing 312000, PR China

<sup>c</sup> State Key Laboratory of Electroanalytical Chemistry, Changchun Institute of Applied Chemistry, Chinese Academy of Sciences, 5625 Renmin Street, Changchun, Jilin 130022, China

<sup>d</sup> Zhejiang Institute of Advanced Materials, Shanghai University, Jiashan 314113, PR China

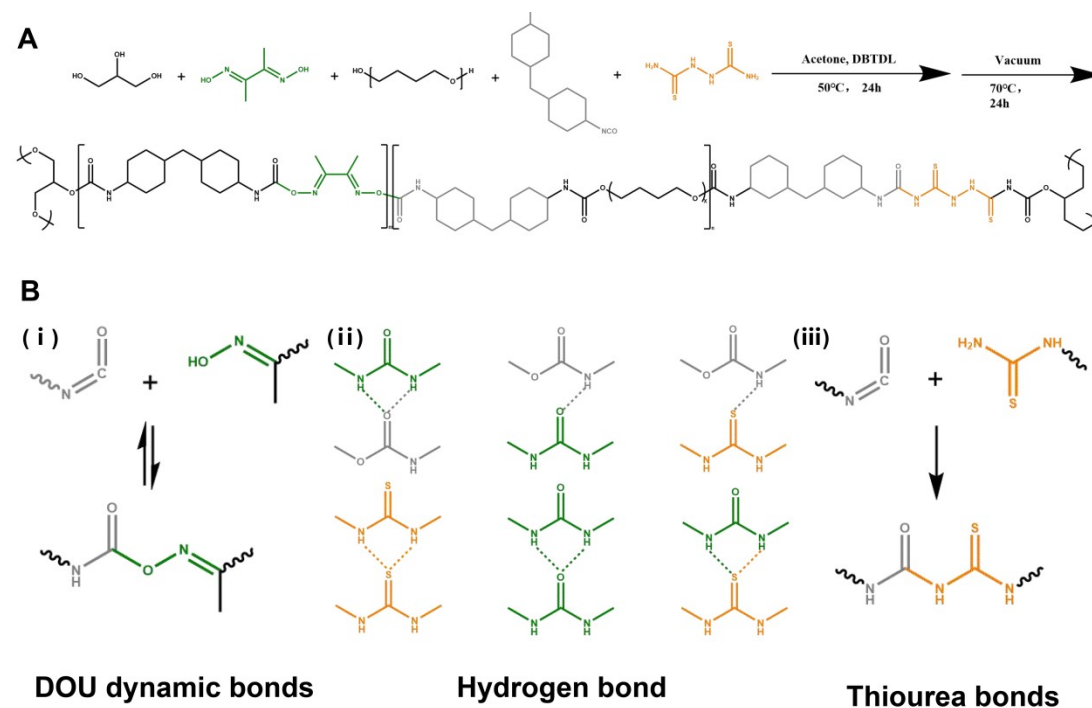

**Figure S1** The route for the synthesis of DDPU.

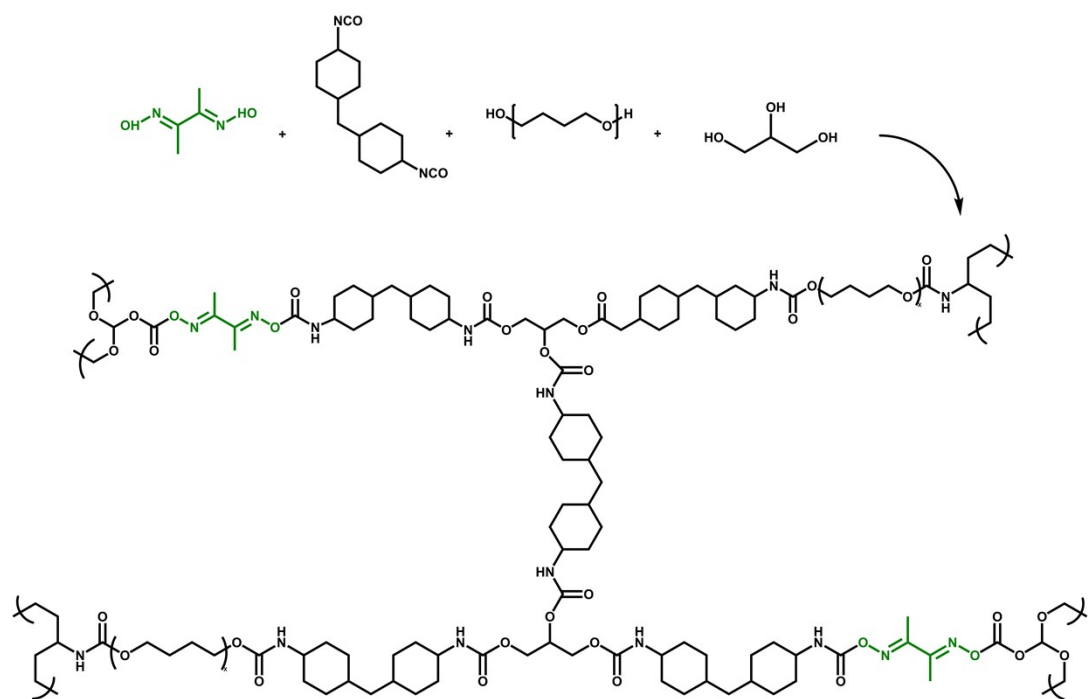

**Figure S2** DOU-PU synthesis roadmap.

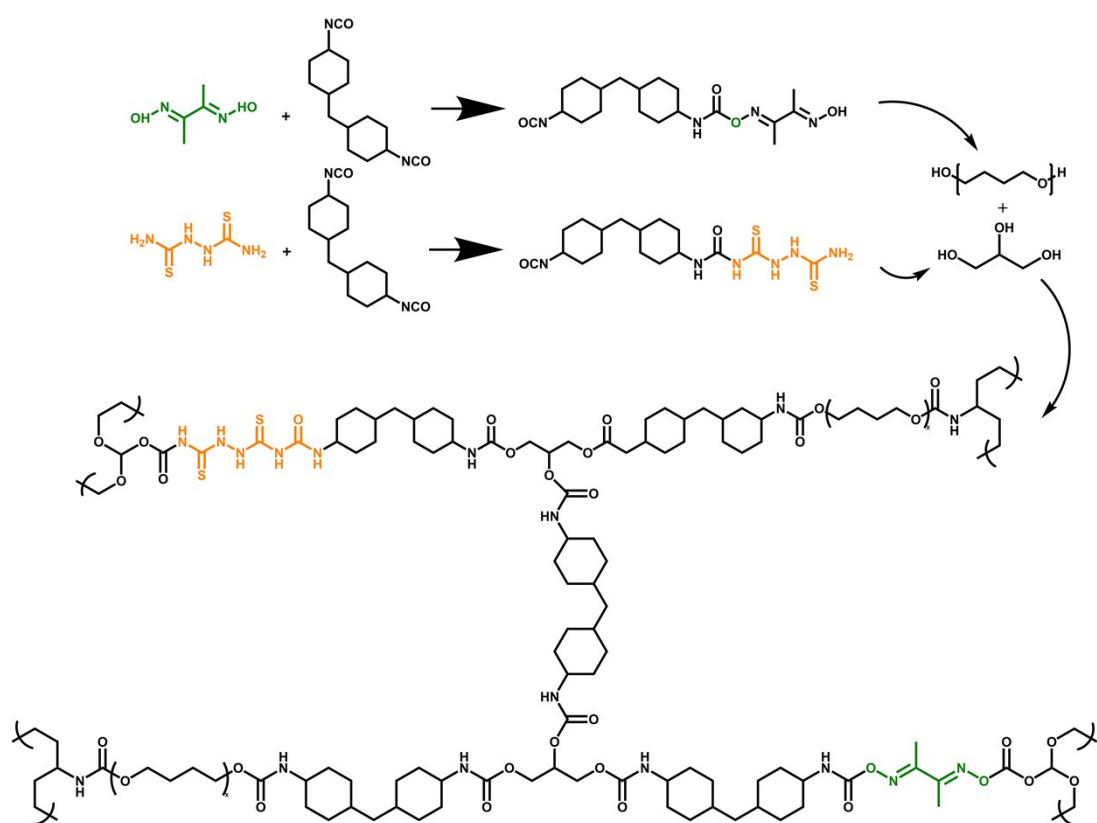

**Figure S3** DDPU synthesis roadmap.

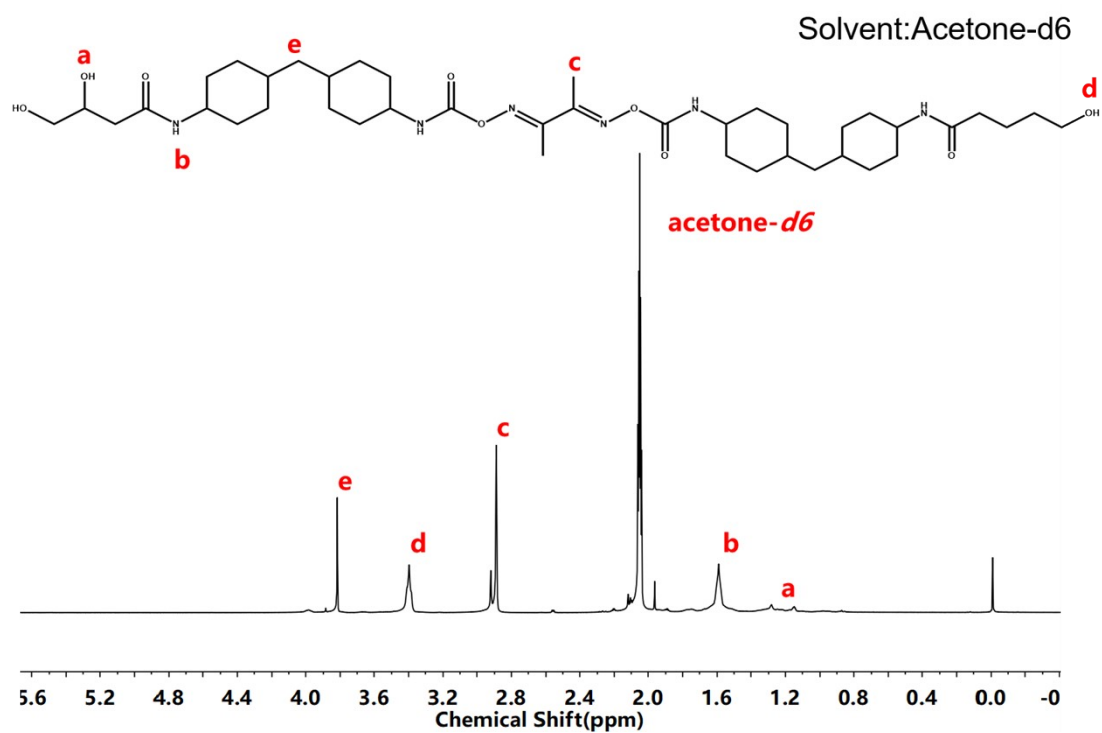

**Figure S4**  $^1\text{H-NMR}$  spectrum (400 MHz, Acetone-*d*6) of Br-thiolactone

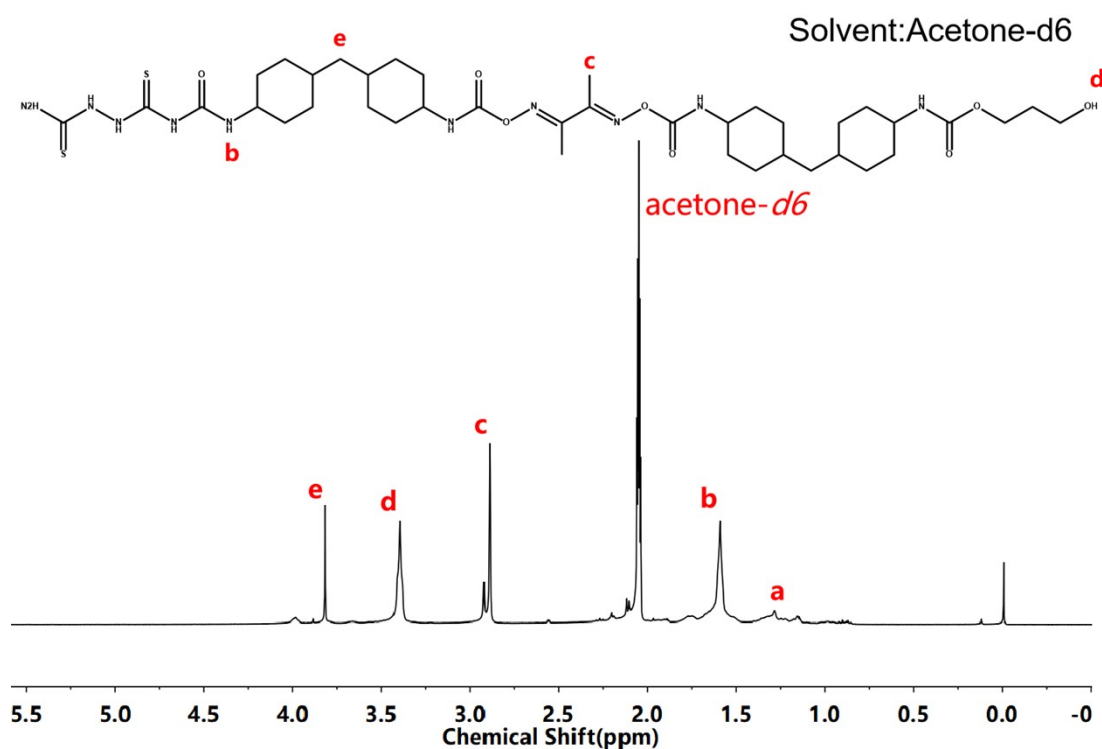

**Figure S5**  $^1\text{H-NMR}$  spectrum (400 MHz, Acetone-*d*6) of DDPU

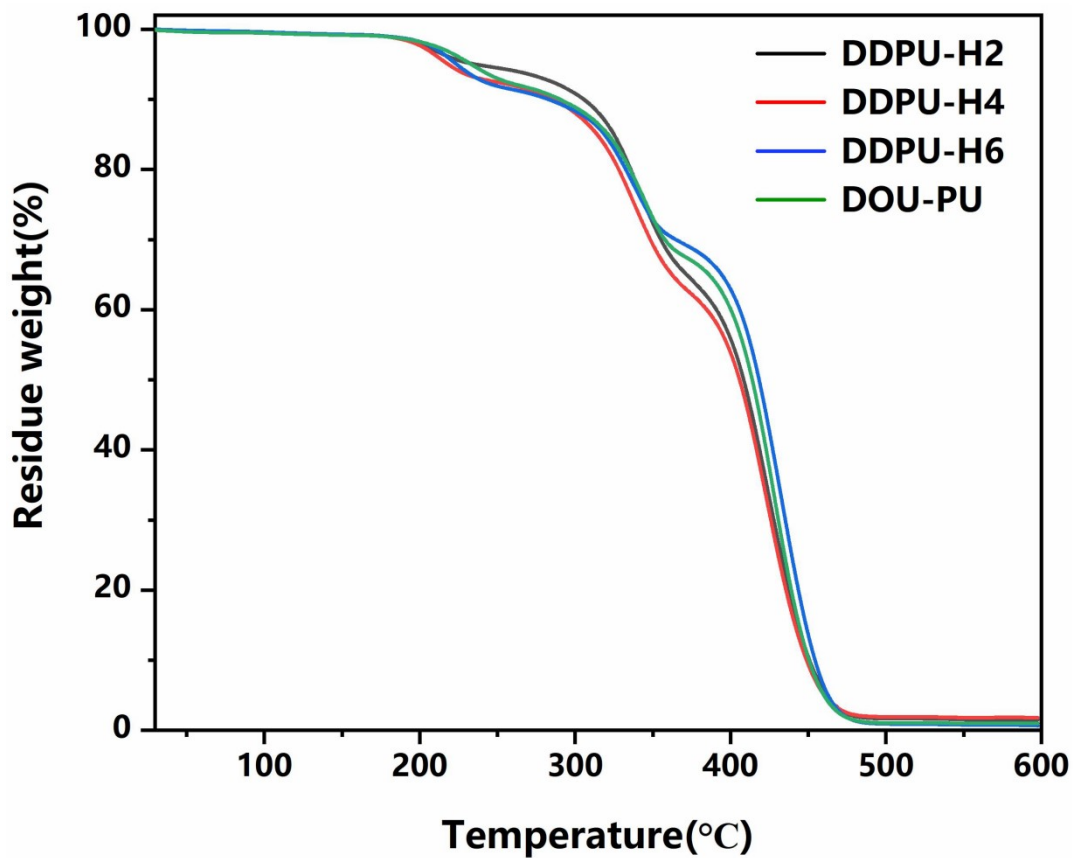

Figure S6 TGA curves of DDPU-H2, DDPU-H4, DDPU-H6 and DOU-PU elastomers

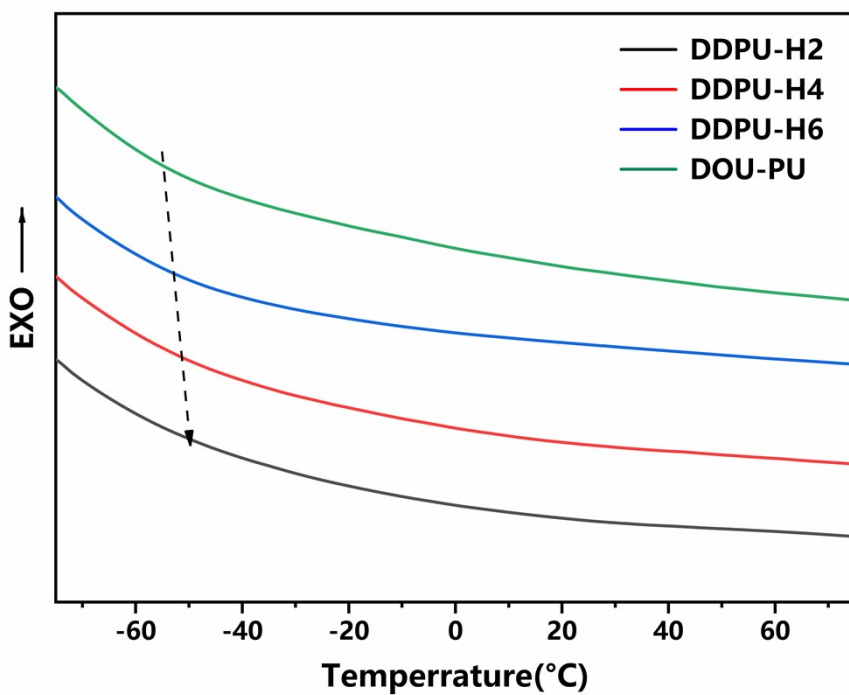

Figure S7 DSC curves of DDPU-H2, DDPU-H4, DDPU-H6 and DOU-PU elastomers

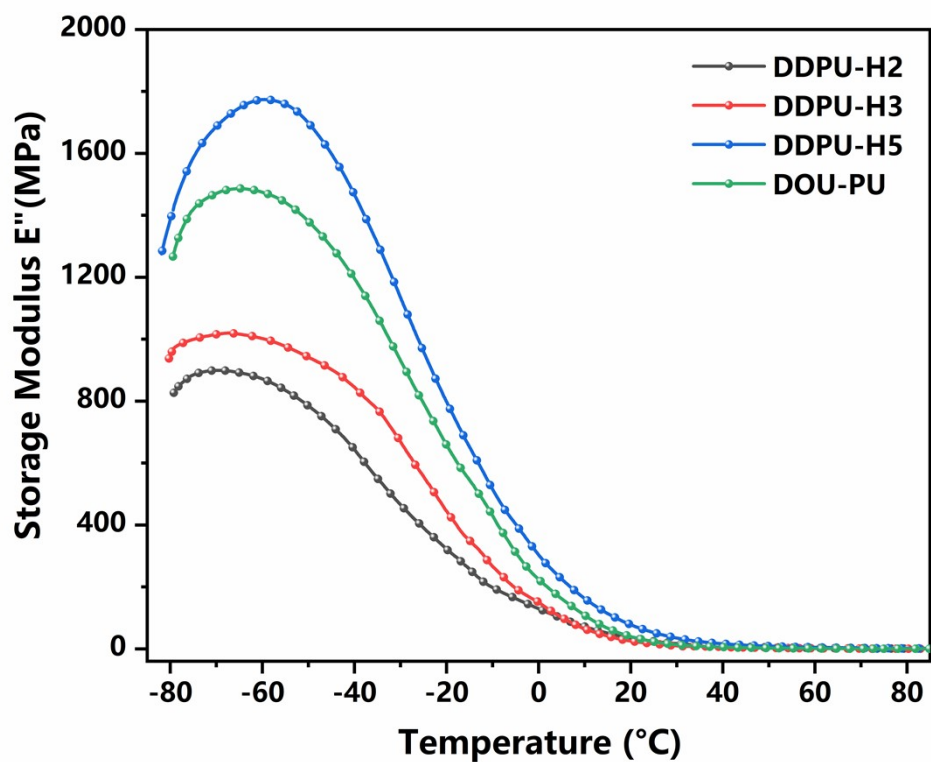

Figure S8 Variation of storage modulus ( $E'$ ) of DDPU and DOU-PU elastomers with temperature.

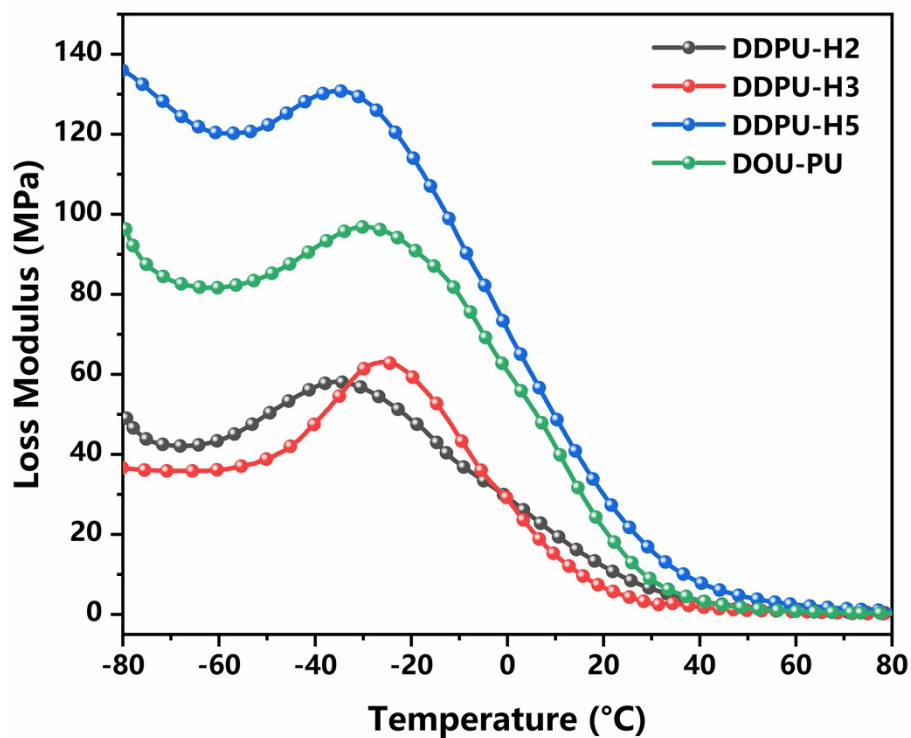

Figure S9 Variation of loss modulus ( $E''$ ) of DDPU and DOU-PU elastomers with temperature.

Table S1 Mechanical properties of DOU-PU, DDPU-H2, DDPU-H3 and DDPU-H4 elastomers

| Sample  | Breaking strength<br>(MPa) | Toughness<br>(MJ m <sup>-3</sup> ) | Breaking elongation<br>(%) |
|---------|----------------------------|------------------------------------|----------------------------|
| DOU-PU  | 7.17±0.36                  | 32.52±3.1                          | 1052.44                    |
| DDPU-H3 | 35.99±0.86                 | 93.17±4.1                          | 811.36                     |
| DDPU-H4 | 19.59±0.58                 | 71.9±4.2                           | 636.25                     |
| DDPU-H5 | 23.39±0.76                 | 60.77±3.3                          | 794.28                     |
| DDPU-H7 | 33.20±0.62                 | 108.95±4.8                         | 581.26                     |

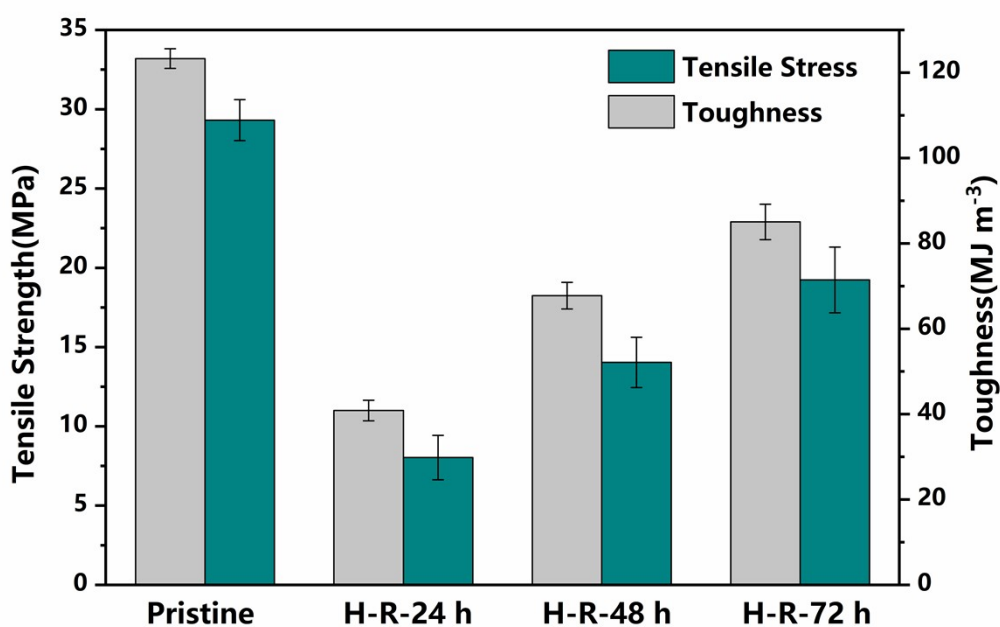

**Figure S10** Tensile strength and toughness of DDPU elastomers healed for different times at room temperature.

**Table S2** Mechanical properties of DDPU elastomer after healing at room temperature for different times.

| Sample  | Breaking strength<br>(MPa) | Toughness<br>(MJ m <sup>-3</sup> ) | Breaking elongation<br>(%) |
|---------|----------------------------|------------------------------------|----------------------------|
| DDPU-H4 | 33.20±0.6                  | 108.95±4.8                         | 581.26                     |
| H-R-24h | 11.07±1.5                  | 29.85±5.2                          | 794.28                     |

|         |             |             |        |
|---------|-------------|-------------|--------|
| H-R-48h | 18.25 ± 1.9 | 52.14 ± 6.6 | 636.25 |
| H-R-72h | 22.92 ± 2.8 | 71.47 ± 8.7 | 811.36 |

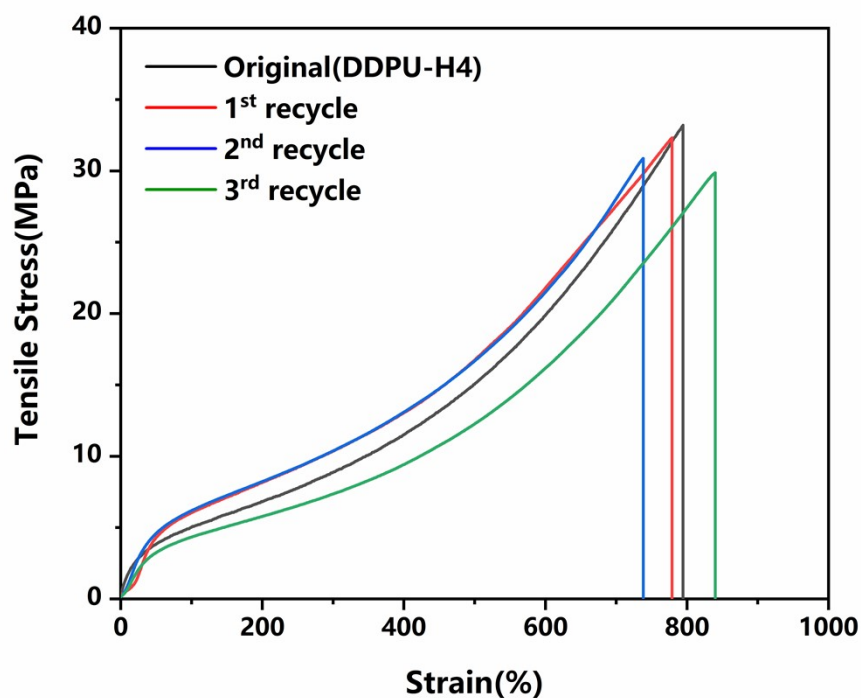

**Figure S11** Stress-strain curve of DDPU-H4 elastomer recovered by hot pressing method.

**Table S3** Mechanical properties of DDPU-H4 elastomer restored by hot pressing method.

| Sample                  | Breaking strength<br>(MPa) | Toughness<br>(MJ m <sup>-3</sup> ) | Breaking elongation<br>(%) |
|-------------------------|----------------------------|------------------------------------|----------------------------|
| Original                | 33.20                      | 108.95                             | 794.27                     |
| 1 <sup>st</sup> recycle | 32.33                      | 113.89                             | 778.90                     |
| 2 <sup>nd</sup> recycle | 30.88                      | 101.88                             | 738.20                     |
| 3 <sup>rd</sup> recycle | 29.87                      | 102.06                             | 839.85                     |

Tensile mechanical properties were carried out on the AGS-X (Shimadzu) tensile machine (test speed: 100 mm min<sup>-1</sup>, gauge length: 15 mm). The toughness is calculated using eq 1.<sup>1,2</sup>

$$Toughness = \int_0^{fracture} \sigma d\varepsilon \quad (1)$$

Here,  $\varepsilon$  represents the strain during the tensile test and  $\sigma$  represents the tensile stress.

The definition of self-healing efficiency ( $\eta$ ) is based on the integral area under the stress-strain curve, which is calculated using the formula below.

$$\eta = \frac{\sigma_{healed}}{\sigma_{original}} \quad (2)$$

In the formula,  $\eta$ —self-healing efficiency (%);

$\sigma_{healed}$ —The toughness of the pattern after healing;

$\sigma_{original}$ —The toughness of original style.

**Table S4** Reagent usage of DOU-PU and DDPU elastomers

|         | PTMEG | HMDI  | Glycerol | DMG   | DBTU  | DBTDL |
|---------|-------|-------|----------|-------|-------|-------|
| DOU-PU  | 1     | 0.622 | 0.023    | 0.116 | 0.000 | 0.02g |
| DDPU-H2 | 1     | 0.622 | 0.023    | 0.058 | 0.044 | 0.02g |
| DDPU-H3 | 1     | 0.622 | 0.023    | 0.070 | 0.035 | 0.02g |
| DDPU-H4 | 1     | 0.622 | 0.023    | 0.081 | 0.026 | 0.02g |
| DDPU-H5 | 1     | 0.622 | 0.023    | 0.093 | 0.018 | 0.02g |
| DDPU-H6 | 1     | 0.622 | 0.023    | 0.104 | 0.009 | 0.02g |
